# Supplementary material for: Fusion of piggyBac-like transposons and herpesviruses occurs frequently in teleosts
Source: PubMed Central journal article supplement (PMC5822658; doi:10.1186/s40851-018-0089-8), 2018-02-21
Supplement: 40851_2018_89_MOESM4_ESM.pdf [file 40851_2018_89_MOESM4_ESM.pdf]

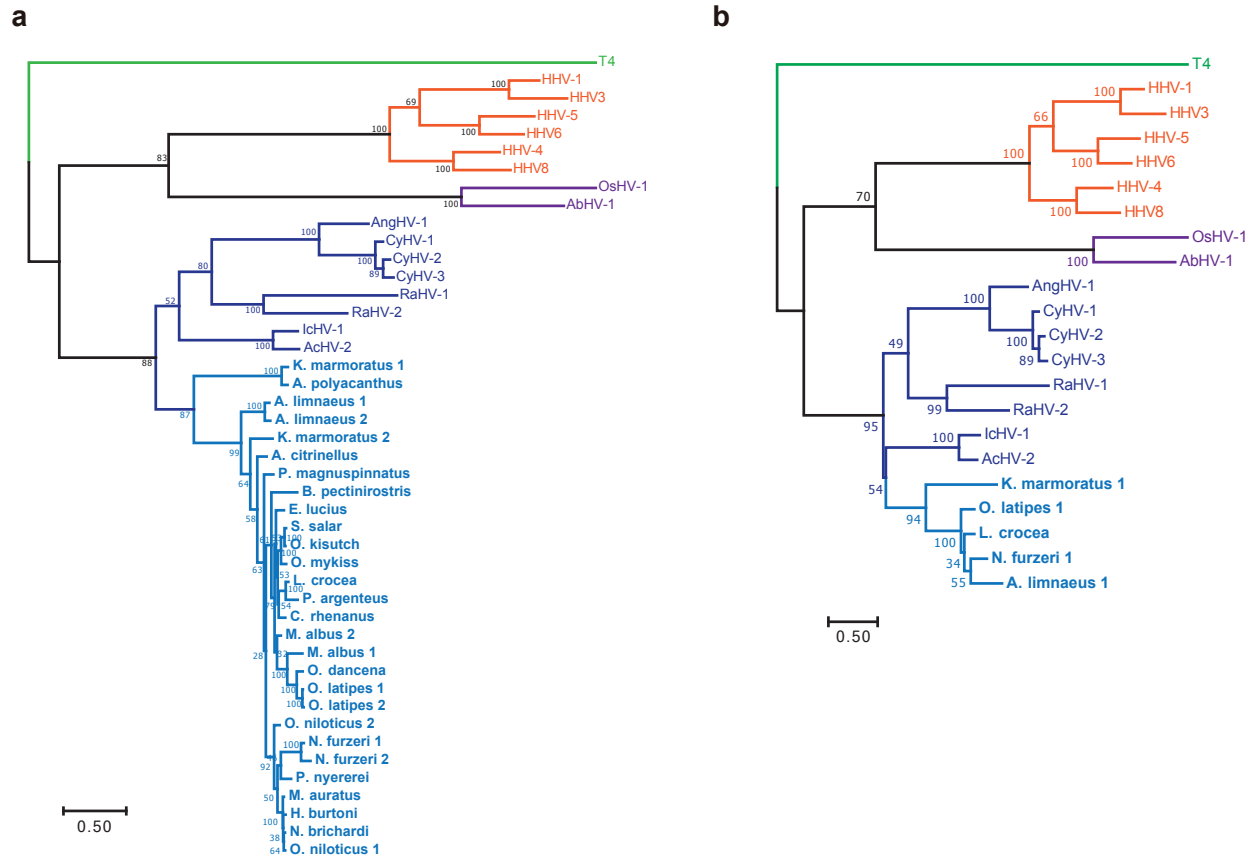

**Figure S3**
